# Supplementary material
Source: ML conference proceedings conference paper supplement (https://aclanthology.org/D18-1374)
Supplement: Attachment [file D18-1374.Attachment.tgz]

# Appendix to Content Explorer: Recommending Novel Entities for a Document Writer

**Michal Lukasik**  
Google AI  
mlukasik@google.com

**Richard Zens**  
Google AI  
zens@google.com

## 1 Intraclass Coefficient

Let us consider the following random effects model:  $Y_{ijk} = \mu + a_i + d_{ij} + r_k + v_{ik} + e_{ijk}$ . Here,  $Y_{ijk}$  corresponds to the score for suggestion (entity)  $j$  recommended to item (document)  $i$  by rater  $k$ ,  $\mu$  corresponds to the average score for the entire annotation,  $a_i$  corresponds the item specific effect,  $d_{ij}$  corresponds to the suggestion-item specific effect,  $r_k$  corresponds to the reviewer specific effect,  $v_{ik}$  corresponds to the item-reviewer specific effect, and  $e_{ijk}$  is the residual. Then, the Intraclass Coefficient for consistency under  $k$  raters takes the following form:

$$ICC(C, k) = \frac{v}{v + (1 - v - r)/3}, \quad (1)$$

where  $v = Var(d_{ij}) + Var(a_i)$  is the variance explained by the underlying score, and  $r = Var(r_k) + Var(v_{ik})$  is the variance corresponding to preferences from reviewers which are discounted (McGraw and Wong, 1996).

## References

- K. O. McGraw and S. P. Wong. 1996. Forming inferences about some intraclass correlation coefficients. *Psychological Methods*, 1(1):30–46.
